# Supplementary material for: Near-infrared emission TMB dots as a colorimetric and fluorescent nanoswitch for the reversible recognition of iron ion and cysteine and their logic gate applications
Source: Royal Society of Chemistry journal article supplement (doi:10.1039/c9ay01749f), 2019-01-01
Supplement: c9ay01749f1.pdf [file c9ay01749f1.pdf]

## Supporting Information

### **Near-Infrared Emission TMB Dots as Colorimetric and Fluorescent Nanoswitch for Reversible Recognition of Iron Ion and Cysteine and Its Logic Gate Application**

*Xiaofei Qin<sup>a,#</sup>, Can Chen<sup>a,#</sup>, Shiyu Zhang<sup>a</sup>, Jixin Zhu<sup>a</sup>, Yongxiang Wang<sup>b</sup>, Jinhua Liu<sup>a\*</sup>*

<sup>a</sup> *Key Laboratory of Flexible Electronics (KLOFE) and Institute of Advanced Materials (IAM), Jiangsu National Synergetic Innovation Center for Advanced Materials (SICAM), Nanjing Tech University (NanjingTech), 30 South Puzhu Road, Nanjing 211816, China*

<sup>b</sup> *Henan Key Laboratory of Chemo/Biosensing and Chemometrics, Henan Joint International Research Laboratory of Chemo/Biosensing and Early Diagnosis of Major Diseases, Shangqiu Normal University, Shangqiu, 476000, China.*

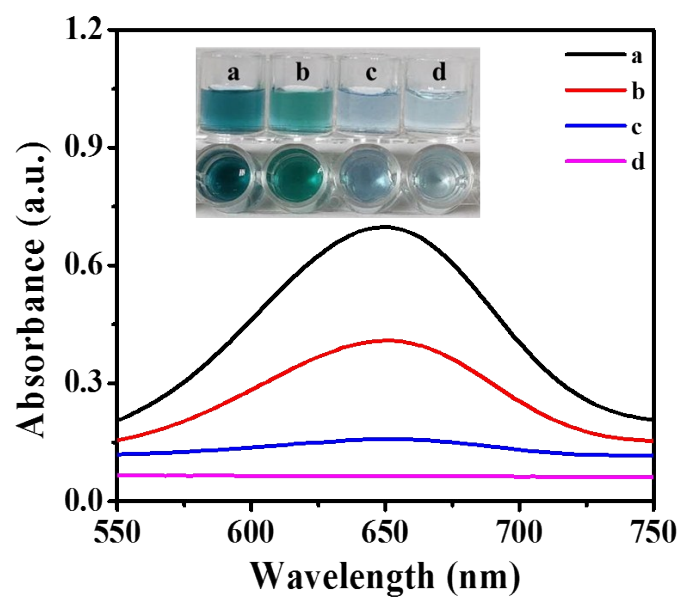

**Fig. S1.** UV-visible absorption spectra of TMBDs (a), TMB-HCl reacted at 200 °C (b), TMB (c) and TMB-HCl (d) in the presence of  $\text{Fe}^{3+}$  (200  $\mu\text{M}$ ) in tris-HCl buffer (pH=6). Inset: visual changes observed for a, b, c and d.

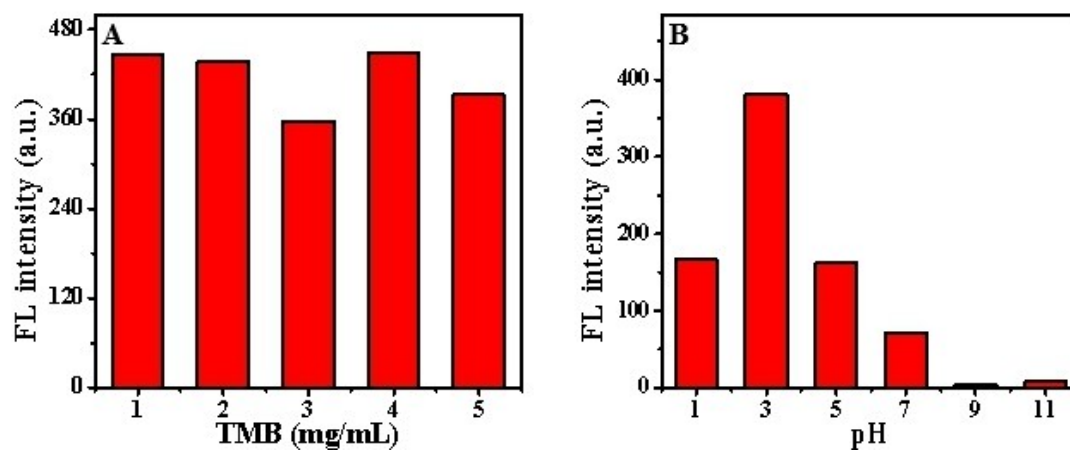

**Fig. S2.** (A) The fluorescence intensity of TMBDs synthesized by different concentration of initial TMB (pH=3). (B)The fluorescence intensity of TMBDs synthesized by different concentration of initial pH (quality of TMB is 40 mg.).

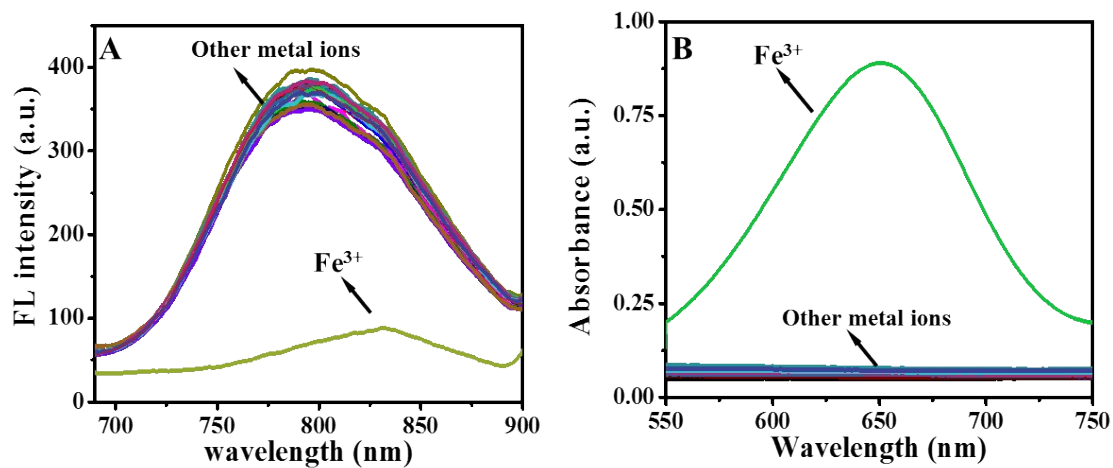

**Fig. S3.** (A) The fluorescence spectra of TMBDs towards metal ions in the Tris-HCl buffer (pH 6, 10 mM); (B) The absorbance spectra of TMBDs towards different metal ions in the Tris-HCl buffer (pH 6, 10 mM); the concentration of metal ions is 200  $\mu\text{M}$ . (Other metal ions are  $\text{Na}^+$ ,  $\text{Ag}^+$ ,  $\text{K}^+$ ,  $\text{Ca}^{2+}$ ,  $\text{Mg}^{2+}$ ,  $\text{Ba}^{2+}$ ,  $\text{Cd}^{2+}$ ,  $\text{Co}^{2+}$ ,  $\text{Cu}^{2+}$ ,  $\text{Ni}^{2+}$ ,  $\text{Hg}^{2+}$ ,  $\text{Pd}^{2+}$ ,  $\text{Cr}^{3+}$ ,  $\text{Al}^{3+}$  and  $\text{Fe}^{2+}$ )

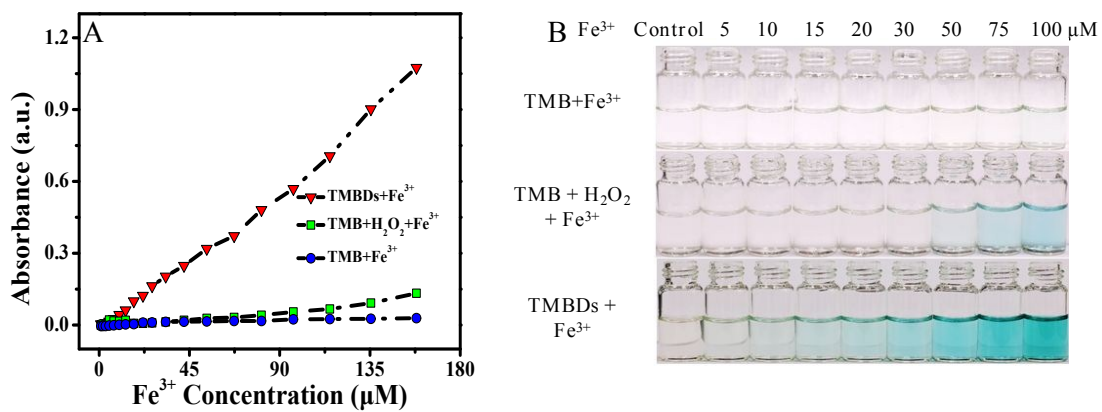

**Fig. S4.** (A) Absorbance intensity at 652 nm of TMB, TMB+H<sub>2</sub>O<sub>2</sub> and TMBDs as a function of Fe<sup>3+</sup> concentration; (B) Photographs of TMB+Fe<sup>3+</sup>, TMB+H<sub>2</sub>O<sub>2</sub> + Fe<sup>3+</sup> and TMBDs + Fe<sup>3+</sup> under visible light.

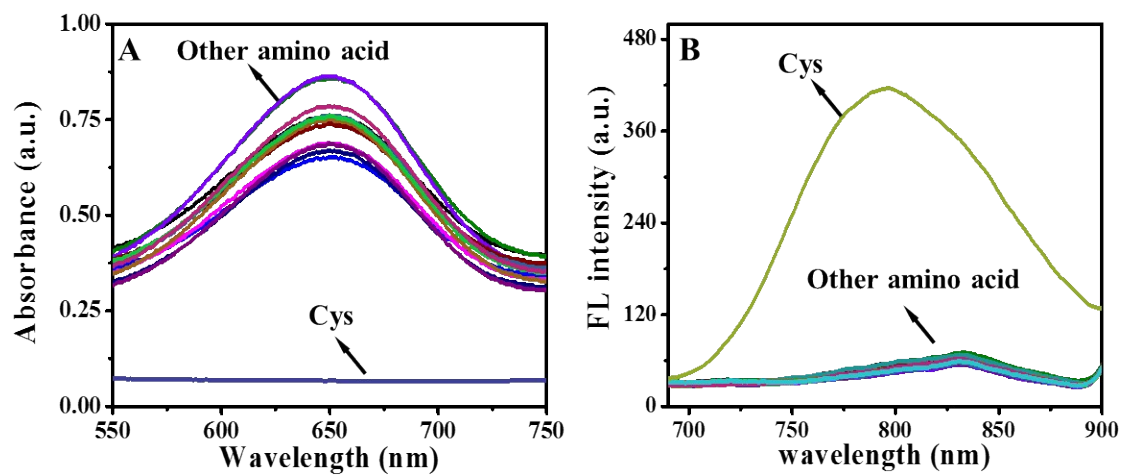

**Fig. S5.** (A) The absorbance of TMBDs towards to different amino acid in tris-HCl buffer (pH 6, 10 mM). (B) The fluorescence spectra of TMBDs towards different amino acids in tris-HCl buffer (pH 6, 10 mM). The concentration of amino acid is 100  $\mu$ M. (Other amino acids are Val, Tyr, Met, Phe, His, Arg, Gly, Glu, Lys, Ser, Thr, Trp, Ile, Ala and Asp).

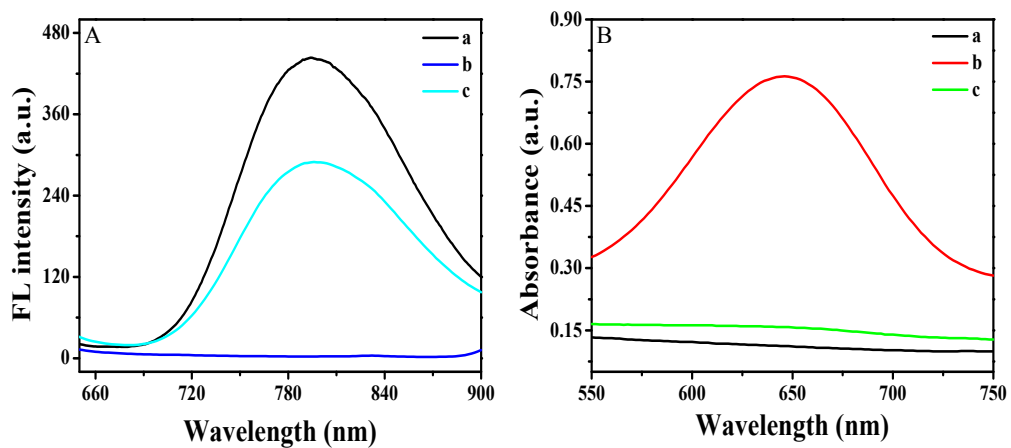

**Fig S6.** Fluorescence spectra (A) and absorbance spectra (B) of TMBDs at different conditions: (a) TMBDs; (b) TMBDs + 150  $\mu\text{M}$   $\text{MnO}_4^-$ ; (c) TMBDs + 150  $\mu\text{M}$   $\text{MnO}_4^-$  + 150  $\mu\text{M}$  AA.

**Table S1** Comparison of some sensor platform for Fe<sup>3+</sup> detection.

| Material                                        | Method       | LOD (μM) | Liner range (μM) | Ref.      |
|-------------------------------------------------|--------------|----------|------------------|-----------|
| Triphenylamine                                  | Fluorescence | 0.107    | 0-150            | 40        |
| Carbon dots                                     | Fluorescence | 0.727    | 0-50             | 41        |
| CdTe QDs                                        | Ratiometric  | 0.0205   | 0-4.5            | 42        |
| DTC-PAS-Au NPs                                  | Colorimetric | 14.82    | 40-80            | 43        |
| 4-(4-hydroxy-1-naphthylazo)benzenesulfonic acid | Colorimetric | 0.0042   | 0.0095-4         | 44        |
| TMBDS                                           | Fluorescence | 7.5      | 30-150           | this work |
| TMBDS                                           | Colorimetric | 0.17     | 20-120           | this work |



**Table S2** Comparison of some sensor platform for Cys detection.

| Material                       | Method       | LOD ( $\mu\text{M}$ ) | Liner range ( $\mu\text{M}$ ) | Ref.      |
|--------------------------------|--------------|-----------------------|-------------------------------|-----------|
| Hg <sub>2</sub> L <sub>2</sub> | Fluorescence | 0.1                   | 0.3-3                         | 45        |
| aN-dots                        | Fluorescence | 5                     | 0-30                          | 46        |
| Quinizarin                     | Fluorescence | 0.158                 | 0-30                          | 47        |
| Pyrimidine                     | Colorimetric | 0.1                   | 0-20                          | 48        |
| TMBDS                          | Fluorescence | 1.5                   | 0-75                          | this work |
| TMBDS                          | Colorimetric | 0.1                   | 0-12                          | this work |

**Table S3** Recovery study of spiked Fe<sup>3+</sup> in 0.5% urine with designed nanoswitch (Abs).

| Samples No | Fe <sup>3+</sup> spiked ( $\mu\text{M}$ ) | Fe <sup>3+</sup> recovered ( $\mu\text{M}$ ) | Recovery (%) |
|------------|-------------------------------------------|----------------------------------------------|--------------|
|            |                                           | mean <sup>a</sup> $\pm$ SD <sup>b</sup>      |              |
| 1          | 0                                         | 0.075 $\pm$ 0.030                            |              |
| 2          | 30                                        | 30.644 $\pm$ 0.698                           | 102.2        |
| 3          | 50                                        | 50.091 $\pm$ 1.195                           | 97.7         |
| 4          | 100                                       | 100.181 $\pm$ 1.652                          | 95.9         |

**Table S4.** Recovery of spiked Fe<sup>3+</sup> in 0.5% urine with designed nanoswitch (FL).

| Samples No | Fe <sup>3+</sup> spiked (μM) | Fe <sup>3+</sup> recovered (μM)     | Recovery (%) |
|------------|------------------------------|-------------------------------------|--------------|
|            |                              | mean <sup>a</sup> ± SD <sup>b</sup> |              |
| 1          | 0                            | 7.296 ± 3.699                       |              |
| 2          | 80                           | 86.623 ± 0.931                      | 108.3        |
| 3          | 100                          | 105.981 ± 0.855                     | 106.0        |
| 4          | 120                          | 125.133 ± 0.678                     | 104.3        |

**Table S5.** Recovery study of spiked Cys in 0.5% urine with designed nanoswitch (Abs).

| Samples No | Cys spiked (μM) | Cys recovered (μM)                  | Recovery (%) |
|------------|-----------------|-------------------------------------|--------------|
|            |                 | mean <sup>a</sup> ± SD <sup>b</sup> |              |
| 1          | 0               | 0.293 ± 0.106                       |              |
| 2          | 3               | 3.172 ± 0.081                       | 105.7        |
| 3          | 8               | 8.056 ± 0.164                       | 100.7        |
| 4          | 10              | 10.448 ± 0.321                      | 104.5        |

**Table S6.** Recovery study of spiked Cys in 0.5% urine with designed nanoswitch

(FL)

---

| Samples No | Cys spiked ( $\mu\text{M}$ ) | Cys recovered ( $\mu\text{M}$ )         | Recovery (%) |
|------------|------------------------------|-----------------------------------------|--------------|
|            |                              | mean <sup>a</sup> $\pm$ SD <sup>b</sup> |              |
| 1          | 0                            | 0.364 $\pm$ 0.304                       |              |
| 2          | 40                           | 36.599 $\pm$ 0.324                      | 91.5         |
| 3          | 50                           | 47.054 $\pm$ 0.547                      | 94.1         |
| 4          | 60                           | 57.642 $\pm$ 0.873                      | 96.1         |

---
